# Supplementary material
Source: Research Square preprint supplement (doi:10.21203/rs.3.rs-9666892/v1)
Supplement: Supplementary file 1 [file 7c2d5f4bf1673a69b85ebe8f.xlsx]

## Sheet: Appendix
Setting	HCPCS Codes Used in Analysis
Nursing Facility	99304, 99305, 99306, 99307, 99308, 99309, 99310, 99315, 99316, 99318
Hospital	99217 - 99226; 99231 - 99239, 99291, 99292
Emergency Room	99281 - 99285, 99288, 99291 - 99292
Office	99201 - 99205, 99211 - 99215
Appendix HCPCS Codes Used to Classify Physician Services by Care Setting
