# Supplementary material
Source: Research Square preprint supplement (doi:10.21203/rs.3.rs-9666892/v1)
Supplement: Supplementary file 2 [file 98c92c07755f2c5ae68b0f88.xlsx]

## Sheet: Table 1
Tier of Group-Level Setting Specialization (GLSS)	≤ 10%	> 10 – 50%	> 50 – 90%	> 90%
Number of groups	738	416	737	2255
Patient and Service Volume, mean (SD)
Number of Beneficiaries	704 (628)	2015 (2198)	6675 (10485)	2590 (7582)
Number of Services	6808 (32335)	14452 (49678)	41239 (166995)	16516 (49561)
Number of Prescriptions	3328 (31450)	6641 (46250)	19086 (159182)	6070 (30505)
Patient Demographics: Gender
Male, %	0.4429	0.4427	0.4446	0.4352
Female, %	0.5571	0.5573	0.5554	0.5648
Patient Demographics: Age
Age, mean (SD)	74.4 (3.3)	73.8 (2.9)	74.2 (2.1)	74.2 (3.1)
Percentage of patients under 65 years old	0.1204	0.1357	0.1115	0.099
Percentage of patients between 65 and 74 years old	0.362	0.3741	0.3891	0.4027
Percentage of patients between 75 and 84 years old	0.3283	0.3188	0.3282	0.3357
Percentage of patients greater than 84 years old	0.1892	0.1713	0.1712	0.1626
Patient Demographics: Race and Ethnicity
Non-Hispanic White, %	0.8164	0.8213	0.8467	0.838
Non-Hispanic Black, %	0.1024	0.1051	0.0727	0.073
Asian or Pacific Islander, %	0.0181	0.0098	0.0173	0.0218
Hispanic, %	0.048	0.0489	0.0473	0.048
Native Americans, %	0.003	0.0055	0.0047	0.0065
Other race, %	0.012	0.009	0.011	0.013
Dually Eligible for Medicare and Medicaid
Non-Dually Eligible, %	0.7299	0.7173	0.7506	0.774
Dually Eligible, %	0.2701	0.2827	0.2494	0.226
Patient Clinical Complexity
Hierarchical Condition Category (HCC) Score, mean (SD)	2.0 (0.8)	1.8 (0.6)	1.8 (0.5)	1.5 (0.7)
MIPS Categorical Scores, mean (SD)
Quality	79.9 (25.0)	77.5 (20.6)	72.9 (18.0)	75.3 (27.3)
Promoting Interoperability (PI)	90.0 (22.3)	93.5 (17.0)	93.0 (19.5)	88.6 (25.3)
Improvement Activities (IA)	38.4 (6.7)	38.9 (5.7)	39.2 (4.9)	38.0 (7.3)
Cost	60.3 (20.6)	57.0 (21.3)	60.1 (16.3)	61.2 (18.7)
Overall MIPS score (includes CPB adjustment)	81.8 (13.8)	83.8 (14.4)	81.5 (12.7)	79.6 (14.9)
Urbanicity
Rural	148 (20.1%)	124 (29.8%)	166 (22.5%)	415 (18.4%)
Urban	590 (79.9%)	292 (70.2%)	571 (77.5%)	1840 (81.6%)
Table 1 Characteristics of Physician Groups and Patient Panels by Group-Level Setting Specialization (GLSS) Tier

## Sheet: Table 2
	Model 1	Model 2	Model 3	Model 4
(Intercept)	0.1*** (0.1 – 0.2)	0.1*** (0.1 – 0.2)	0.1*** (0.1 – 0.2)	0.1*** (0.1 – 0.2)
GLSS:
≤ 10%	reference	reference	reference	reference
> 10 – 50%	1.1 (0.8 – 1.6)	1.1 (0.8 – 1.6)	1.1 (0.8 – 1.6)	1.1 (0.8 – 1.6)
> 50 – 90%	1.5** (1.1 – 2.0)	1.5** (1.1 – 2.0)	1.5** (1.1 – 2.0)	1.5** (1.1 – 2.1)
> 90%	1.6*** (1.2 – 2.0)	1.6*** (1.2 – 2.1)	1.6*** (1.2 – 2.0)	1.6*** (1.2 – 2.1)
Covariates:
Group-Level Beneficiary Risk		1.0 (0.9 – 1.2)	1.0 (0.9 – 1.2)	1.0 (0.9 – 1.2)
Percentage of Dually Eligible Patients			1.0 (1.0 – 1.0)	1.0 (1.0 – 1.0)
Number of Physicians in Group				1.0 (1.0 – 1.0)
Num. obs.	4146	4146	3908	3908
Note: 236 observations were dropped from Models 3 and 4 due to missing information about dual eligible status.
* p < 0.05, ** p < 0.01, *** p < 0.001
Table 2 Association Between GLSS Tier and Likelihood of MIPS Penalty

## Sheet: Table 3
MIPS Performance Category	Quality	Promoting Interoperability (PI)	Improving Activities (IA)	Cost
(Intercept)	87.3*** ( 83.9 – 90.8)	92.3*** ( 87.9 – 96.7)	39.4*** ( 38.4 – 40.3)	60.4*** ( 57.2 – 63.6)
GLSS:
≤ 10%	reference	reference	reference	reference
> 10 – 50%	-2.6 ( -6.0 – 0.8)	3.1 ( -1.4 – 7.6)	0.4 ( -0.5 – 1.3)	-3.2 ( -6.7 – 0.2)
> 50 – 90%	-6.8*** ( -9.8 – -3.7)	1.3 ( -2.4 – 5.1)	0.4 ( -0.4 – 1.2)	-0.5 ( -3.4 – 2.4)
> 90%	-6.3*** ( -8.9 – -3.7)	-2.1 ( -5.6 – 1.3)	-0.7 ( -1.4 – 0.0)	0.9 ( -1.6 – 3.4)
Covariates:
Patient clinical complexity score	-2.9*** ( -4.5 – -1.4)	-1.4 ( -3.5 – 0.7)	-0.4 ( -0.8 – 0.0)	0.0 ( -1.4 – 1.4)
Percentage of Dually Eligible Patients	-0.1* ( -0.1 – 0.0)	0.0 ( -0.1 – 0.1)	0.0 ( 0.0 – 0.0)	0.0 ( -0.1 – 0.1)
Number of Physicians in Group	0.0 ( -0.1 – 0.0)	0.1*** ( 0.0 – 0.1)	0.0*** ( 0.0 – 0.0)	0.0 ( 0.0 – 0.0)
Table 3 Adjusted Associations Between GLSS Tier and MIPS Performance Category Scores

## Sheet: Table 4
Urbanicity	Urban	Rural
(Intercept)	0.1*** (0.1 – 0.1)	0.5 (0.2 – 1.2)
GLSS:
≤ 10%	reference	reference
> 10 – 50%	1.3 (0.9 – 2.1)	0.7 (0.4 – 1.4)
> 50 – 90%	2.0*** (1.4 – 2.8)	0.7 (0.4 – 1.4)
> 90%	2.0*** (1.5 – 2.8)	0.8 (0.5 – 1.3)
Covariates:
Group-Level Beneficiary Risk	1.1 (0.9 – 1.3)	0.6 (0.3 – 1.1)
Percentage of Dually Eligible Patients	1.0 (1.0 – 1.0)	1.0 (1.0 – 1.0)
Number of Physicians in Group	1.0 (1.0 – 1.0)	1.0 (1.0 – 1.0)
Table 4 Association Between GLSS Tier and MIPS Penalty Stratified by Urbanicity

## Sheet: Appendix
Setting	HCPCS Codes Used in Analysis
Nursing Facility	99304, 99305, 99306, 99307, 99308, 99309, 99310, 99315, 99316, 99318
Hospital	99217 - 99226; 99231 - 99239, 99291, 99292
Emergency Room	99281 - 99285, 99288, 99291 - 99292
Office	99201 - 99205, 99211 - 99215
Appendix HCPCS Codes Used to Classify Physician Services by Care Setting
